# Anaerobic hexadecane degradation by a thermophilic Hadarchaeon from Guaymas Basin

David Benito Merino<sup>1,2,\*</sup>, Julius S. Lipp<sup>3</sup>, Guillaume Borrel<sup>4</sup>, Antje Boetius<sup>1,3,5</sup>, Gunter Wegener<sup>1,3,\*</sup>

<sup>1</sup>Max Planck Institute for Marine Microbiology, Celsiusstraße 1, 28359, Bremen, Germany

<sup>2</sup>Faculty of Geosciences, University of Bremen, Klagenfurter Straße 2, 428359, Bremen, Germany

<sup>3</sup>MARUM, Center for Marine Environmental Sciences, University of Bremen, Leobener Straße 8, 28359, Bremen, Germany

<sup>4</sup>Department of Microbiology, Unit Evolutionary Biology of the Microbial Cell, Institut Pasteur, 25 rue du Dr Roux, 75015, Paris, France

<sup>5</sup>Alfred Wegener Institute Helmholtz Center for Polar and Marine Research, Am Handelshafen 12, 27570, Bremerhaven, Germany

\*Corresponding authors: Gunter Wegener, MARUM, Center for Marine Environmental Sciences, Leobener Straße 8, 28359 Bremen, Germany.

Email: gwegener@marum.de and David Benito Merino, Max Planck Institute for Marine Microbiology, Celsiusstraße 1, 28359, Bremen, Germany.

Email: dbenito@mpi-bremen.de

## Abstract

*Hadarchaeota* inhabit subsurface and hydrothermally heated environments, but previous to this study, they had not been cultured. Based on metagenome-assembled genomes, most *Hadarchaeota* are heterotrophs that grow on sugars and amino acids, or oxidize carbon monoxide or reduce nitrite to ammonium. A few other metagenome-assembled genomes encode alkyl-coenzyme M reductases (Acrs),  $\beta$ -oxidation, and Wood-Ljungdahl pathways, pointing toward multicarbon alkane metabolism. To identify the organisms involved in thermophilic oil degradation, we established anaerobic sulfate-reducing hexadecane-degrading cultures from hydrothermally heated sediments of the Guaymas Basin. Cultures at 70°C were enriched in one Hadarchaeon that we propose as *Candidatus Cerberiarchaenum oleivorans*. Genomic and chemical analyses indicate that *Ca. C. oleivorans* uses an Acr to activate hexadecane to hexadecyl-coenzyme M. A  $\beta$ -oxidation pathway and a tetrahydromethanopterin methyl branch Wood-Ljungdahl (mWL) pathway allow the complete oxidation of hexadecane to CO<sub>2</sub>. Our results suggest a syntrophic lifestyle with sulfate reducers, as *Ca. C. oleivorans* lacks a sulfate respiration pathway. Comparative genomics show that Acr, mWL, and  $\beta$ -oxidation are restricted to one family of *Hadarchaeota*, which we propose as *Ca. Cerberiarchaeeaceae*. Phylogenetic analyses further indicate that the mWL pathway is basal to all *Hadarchaeota*. By contrast, the carbon monoxide dehydrogenase/acetyl-coenzyme A synthase complex in *Ca. Cerberiarchaeeaceae* was horizontally acquired from *Bathyarchaeia*. The Acr and  $\beta$ -oxidation genes of *Ca. Cerberiarchaeeaceae* are highly similar to those of other alkane-oxidizing archaea such as *Ca. Methanoliparia* and *Ca. Helarchaeales*. Our results support the use of Acrs in the degradation of petroleum alkanes and suggest a role of *Hadarchaeota* in oil-rich environments.

**Keywords:** Archaea, alkanes, hydrocarbons, anaerobic metabolism, evolution

## Introduction

The methyl-coenzyme M reductase (Mcr) is an enzyme unique to the domain *Archaea*. Originally, this enzyme was described from methanogens, strict anaerobes that form methane from various substrates such as CO<sub>2</sub>, formate, acetate, and methylated compounds [1]. Anaerobic methane-oxidizing archaea (ANME) use Mcr variants to activate methane to methyl-CoM [2], and they completely oxidize the carbon to CO<sub>2</sub> using a reverse methanogenesis pathway [3]. Related members of the *Halobacterota*, namely *Ca. Syntrophoarchaeum*, *Ca. Alkanophaga*, *Ca. Ethanoperedens*, and *Ca. Argoarchaeum*, thrive on short- and midchain alkanes [4–7]. They activate alkanes with divergent Mcr types (alkyl-coenzyme M reductases, Acrs) and form the corresponding alkyl-CoM [4–7]. Subsequently, these anaerobic multicarbon alkane degraders (ANKA) [8, 9] convert the alkyl-CoM to acyl-CoA, which is completely oxidized to CO<sub>2</sub> via the  $\beta$ -oxidation and the Wood-Ljungdahl (WL) pathways [4, 5]. In the case of *Ca. Ethanoperedens* and *Ca. Argoarchaeum*, they activate ethane to

ethyl-CoM, convert it to acetyl-CoA, and oxidize it to CO<sub>2</sub> via the WL pathway [6, 7]. Most ANME and other short- and midchain alkane-oxidizing archaea do not possess respiratory pathways to couple the oxidation of their substrates to sulfate reduction [4–7, 10–14]. Instead, they form syntrophic interactions with partner sulfate-reducing bacteria (SRB) of the phylum *Desulfobacterota*, such as members of the Seep-SRB, *Ca. Desulfoservidus auxillii*, or *Thermodesulfobacteria* [4–6, 15, 16]. By contrast, *Ca. Methanoliparia* are nonsyntrophic ANKA. *Ca. Methanoliparia* couple the oxidation of alkanes via Acr activation to CO<sub>2</sub>-reducing methanogenesis via Mcr [17–19]. *Ca. Methanoliparia* oxidizes long-chain alkanes (chain length C<sub>≥13</sub>) and benzene- and cyclohexane-substituted alkanes [19].

Recent metagenomic studies revealed the presence of either Mcr or Acr in metagenome-assembled genomes (MAGs) of uncultured archaea related to classical methanogens, such as *Archaeoglobi*, and also distant groups such as *Bathyarchaeia*, *Ca. Helarchaeales*, and *Hadarchaeota* [20–23]. Previous work suggests that gene duplication and horizontal gene transfer (HGT) events

Received 25 October 2023. Accepted: 6 November 2023

© The Author(s) 2024. Published by Oxford University Press on behalf of the International Society for Microbial Ecology.

This is an Open Access article distributed under the terms of the Creative Commons Attribution License (<https://creativecommons.org/licenses/by/4.0/>), which permits unrestricted reuse, distribution, and reproduction in any medium, provided the original work is properly cited.

have been important in the evolution of Mcr/Acr genes and alkane metabolisms in archaea [24]. Yet, neither these Acr-containing organisms, nor close relatives have been cultured. Among them, *Hadarchaeota* might have a globally relevant role, because of their wide distribution in subsurface environments [25]. *Hadarchaeota* were originally described as the South African Goldmine Miscellaneous Euryarchaeal Group, which were found in alkaline sulfate-rich mining fissure waters [26]. *Hadarchaeota* inhabit diverse anoxic subsurface habitats such as hot springs, hydrothermal sediments, deep marine sediments, aquifers, and cold seeps [23, 25, 27–30]. The high GC content (57%–61%) in the sequenced rRNAs suggested that *Hadarchaeota* are thermophiles [26]. This lineage was recently proposed to be a phylum (*Hadarchaeota*) [31], including at least 30 MAGs from public repositories [23, 25, 32]. Of these, some hot-spring *Hadarchaeota* MAGs encode an Acr related to those of *Ca. Methanoliparia*, but their alkane substrates have not been characterized [23].

In this study, we targeted the cultivation of long-chain alkane degrading microorganisms from hydrothermal sediments of the Guaymas Basin, located in the Gulf of California at 2000 m depth [33]. Here, hydrocarbon-rich fluids diffuse from deeper layers toward the sediment surface, where they fuel the metabolism of diverse microbial communities [34–36]. Of these, we enriched anoxic microbes with hexadecane as substrate and analyzed the microbial community and metabolism by “omics and metabolite analysis.” We tested the hypothesis that members of the *Hadarchaeota* are involved in alkane degradation in thermophilic anoxic environments and suggest that *Hadarchaeota* acquired the necessary pathways for alkane metabolism via HGT from other archaea.

## Materials and methods

### Sediment sampling and culture setup

For this study, we retrieved sediments from Guaymas Basin during R/V Atlantis cruises AT37-06 (December 2016) and AT42-05 (November 2018) with the submersible *Alvin*. On cruise AT37-06, the push cores were taken during *Alvin* dive 4869 (27° 04.5' N 111° 24.54' W, water depth 2001 m) from a site densely covered by an orange mat of large sulfur-oxidizing *Beggiatoaceae* bacteria. Below the mat, temperatures rapidly increased and reached 85°C at 50 cm depth [37]. On cruise AT42-05, a push core was taken during *Alvin* dive 4991 (27° 0.69' N, 111° 24.27' W, water depth 2013 m) from a site covered with orange-white *Beggiatoaceae* mats. Temperatures at 50 cm depth reached at least 80°C. Both samples were immediately transferred to glass bottles sealed with butyl rubber stoppers, and the headspace was exchanged to argon. Bottled sediments were stored at room temperature until further processing. Anoxic sediment slurries were prepared as described before [38]. Homogenized sediment from 2 to 10 cm was mixed with synthetic sulfate-reducer medium [38, 39]. This slurry was distributed into replicate cultivation vials and further diluted reaching a final density of ~1 g sediment per 100 ml. The slurries were amended with 1 ml *n*-hexadecane (99% purity, Sigma-Aldrich) as carbon and energy source. The vials were sealed with butyl rubber stoppers and pressured with 2 atm N<sub>2</sub>:CO<sub>2</sub> (90:10). The bottles were incubated upside down to avoid chemical reactions of the alkane substrate with the rubber stopper. Samples were incubated at 37, 50, and 70°C with mild agitation (rotation 40 rpm). As marker for anaerobic alkane degradation, we followed the formation of sulfide using a colorimetric copper sulfide assay [40]. Cultures with hexadecane at 70°C (hexadecane70) were

subsequently diluted (1,4 dilution steps) when sulfide concentrations reached between 5 and 10 mM.

### DNA extraction and 16S rRNA gene sequencing

DNA was extracted from early enrichments at 37, 50, and 70°C using the MO Bio PowerSoil DNA isolation kit (Qiagen). 16S rRNA gene amplicon libraries were prepared according to the Illumina 16S metagenomic sequencing library preparation protocol ([support.illumina.com/documents/documentation/chemistry\\_documentation/16s/16s-metagenomic-library-prep-guide-15044223-b.pdf](https://support.illumina.com/documents/documentation/chemistry_documentation/16s/16s-metagenomic-library-prep-guide-15044223-b.pdf)). We amplified the V3–V4 region for bacteria and the V4–V6 region for archaea (Supplementary Table S1). The 16S rRNA gene libraries were sequenced at CeBiTec (Bielefeld, Germany) on a MiSeq (Illumina; 2 × 300-bp paired-end run, 100 000 reads per library). Sequences were analyzed in R Statistical Software v 3.5.1 ([R-project.org/](https://www.R-project.org/)) with DADA2 v. 1.14 [41]. DADA2 scripts used for 16S rRNA gene analysis are accessible on GitHub ([github.com/dbenitot/Metagenomics\\_scripts/blob/main/dada2\\_archaea.R](https://github.com/dbenitot/Metagenomics_scripts/blob/main/dada2_archaea.R) and [github.com/dbenitot/Metagenomics\\_scripts/blob/main/dada2\\_bacteria.R](https://github.com/dbenitot/Metagenomics_scripts/blob/main/dada2_bacteria.R)).

### DNA extraction and metagenome sequencing

DNA samples from hexadecane70 cultures were extracted at three different stages for AT37-06 samples (February 2018, September 2018, and March 2020) and at one point for AT42-05 samples (June 2021). Sampling and experimental timepoints are schemed in Supplementary Fig. S1. For the sediment-free samples, 50 ml of culture was concentrated on 0.2 μm pore polycarbonate filters (Millipore, type GTTP filters) using a gentle vacuum (−40 kPa). DNA was extracted using the DNeasy PowerWater Kit (Qiagen). Metagenomes from February 2018 were sequenced at CeBiTec (Bielefeld, Germany) on a MiSeq (Illumina, 2 × 300-bp paired-end run, 2 × 10<sup>6</sup> reads). Metagenomes from September 2018 were sequenced at the Marine Biological Laboratory (Woods Hole, USA) on a HiSeq (Illumina; 2 × 150-bp paired-end run, 1.5 × 10<sup>6</sup> reads). Metagenomes from March 2020 to June 2021 were sequenced at the Max-Planck-Genome-Centre (Cologne, Germany) on a MiSeq (2 × 250-bp paired-end run, 4 × 10<sup>6</sup> and 10 × 10<sup>6</sup> reads, respectively).

### Metagenomics analyses

Primers and adapter sequences were removed from raw metagenomic reads and they were quality trimmed with BBduk within the BBtools package v. 35.68 ([sourceforge.net/projects/bbmap/](https://sourceforge.net/projects/bbmap/)), with the parameters minlength = 50 mink = 6 hdist = 1 qtrim = r trimq = 20. Microbial community composition based on 16S rRNA gene abundance was calculated with phyloFlash v. 3.3b1 [42]. Quality-trimmed reads were coassembled in metagenomic contigs with SPAdes v. 3.9.0 [43] with default parameters. Quality-trimmed reads were mapped to the coassembly with Bowtie2 v. 2.3.2 [44] using the parameters `-local -q`. Metagenomic contigs were imported into the “omics analysis software anvi” v. 6 [45, 46]. Gene prediction in metagenomic contigs was done with Prodigal v 2.6 [47]. Coding sequences were annotated with Prokka v 1.11, PFAMs, TIGRFAMs, COGs, KEGGs, and RNAmmer [48–53]. CXXCH motifs in putative multiheme cytochromes (MHCs) were searched with a custom script ([github.com/dbenitot/Metagenomics\\_scripts/blob/main/CXXCH\\_search\\_anvio\\_import.sh](https://github.com/dbenitot/Metagenomics_scripts/blob/main/CXXCH_search_anvio_import.sh)). Metagenomic binning was done with maxbin v. 2.2.7 [54]. Bins obtained with maxbin were manually refined in anvi'o [45, 46] by removing contigs whose coverage did not match the overall coverage of the bins. Average nucleotide identity (ANI) between

our bins and reference genomes was calculated with fastANI v. 1.31 [55]. Pyruvate-formate lyase (Pfl) and alkyl-succinate synthase (Ass) proteins were searched in the *Archaeoglobi* MAGs by aligning Pfl of *Archaeoglobus fulgidus* and Ass of *Desulfatibacillum alkenivorans* against the proteins of our *Archaeoglobi* MAGs using BLASTp [56]. Optimal growth temperatures in *Hadarchaeota* MAGs were predicted with the OGT\_prediction tool [57].

### Synthesis of authentic hexadecyl-CoM standards

One equivalent (0.3 g) of sodium 2-mercaptoethanesulfonate ( $\geq 98\%$  coenzyme M sodium salt, Sigma-Aldrich) was mixed with two equivalents (0.62 ml) of 1-bromohexadecane (97%, Sigma-Aldrich) in 2.4 ml basic ammonia solution (30%  $\text{NH}_4\text{OH}$  pH  $\sim 12$ ). The mix was incubated overnight at RT with gentle shaking in a vortex (500 rpm). The aqueous phase was transferred to a new vial and pH was adjusted to 7.0 with 37% HCl.

### Metabolite sample extractions

Thirty milliliters of culture were centrifuged at 4000 rpm for 30 min at RT, keeping both the pellet and the supernatant. The supernatant was removed and filtered onto polycarbonate filters (0.22  $\mu\text{m}$  pore size, Merck Millipore) under gentle vacuum ( $> 30$  kPa). Filter pieces and pellet were transferred to bead beating tubes (Lysing Matrix E, MP Biomedicals) with 1 ml of acetonitrile:methanol:water (4,4,2, v,v,v). The tubes were vortexed for 10 min at maximum speed. Beads and debris were pelleted by centrifugation at 10000 rpm for 20 min at RT. The clear supernatant was transferred to glass vials and stored at 4°C.

### Liquid chromatography-mass spectrometry of metabolite extracts and standards

Chemical analysis of metabolite extracts and alkyl-CoM was done as described previously [5]. Culture extracts and hexadecyl-CoM standards were analyzed via high-resolution accurate-mass mass spectrometry on a Bruker maXis plus quadrupole time-of-flight mass spectrometer (Bruker Daltonics, Bremen, Germany) connected to a Thermo Dionex Ultimate 3000RS UHPLC system (Thermo Fisher Scientific, Bremen, Germany) via an electrospray ionization ion source. Sample aliquots (equivalent to 20% of total extract) were evaporated under a nitrogen stream and redissolved in 10  $\mu\text{l}$  of methanol:water (1:1, v:v) before injection. Separation was done on an Acclaim C30 reversed phase column (Thermo Fisher Scientific, 3.0  $\times$  250 mm, 3  $\mu\text{m}$  particle size). The column oven was set to 40°C, and the binary pump was programmed with a flow rate of 0.35 ml/min and the following gradient of eluent A (acetonitrile:water:formic acid 5:95:0.1, v:v:v) and eluent B (2-propanol,acetonitrile,formic acid 90:10:0.1, v:v:v): 0% B at 0 min, ramp up to 100% B at 30 min, hold at 100% B until 50 min, and reequilibration at 0% B from 51 min until the end of the run at 60 min. Parameters for the electrospray ion source were set as described previously [5]. The mass spectrometer was set to acquire alternating scans of full scan and broad-band collision-induced dissociation spectra (25 eV collision energy) in a mass range of  $m/z$  50–600 in negative ionization mode. Every analysis was mass-calibrated to reach mass accuracy of 1–3 ppm by loop injection of a calibration solution containing sodium formate cluster ions at the end of the analysis during the equilibration phase and using the high-precision calibration algorithm. Extracted ion chromatograms were generated using a mass window of 0.01 Da. Data processing was performed using the Compass Data Analysis software package version 5.0 (Bruker Daltonics, Bremen, Germany).

### Phylogenomic and phylogenetic analyses

For archaeal phylogenomics, 289 archaeal genomes were used to build a tree based on 76 archaeal marker proteins (Supplementary Table S2) [58]. To build phylogenetic trees for methyl/alkyl-coenzyme M reductase subunit A (McrA/AcrA), formylmethanofuran dehydrogenase (FwdABC), and carbon monoxide dehydrogenase (CdhABCDE), we annotated the gene sequences using PFAMs for McrA/AcrA and Fwd, and custom hidden Markov models for Cdh [59]. The amino acid sequences for each gene set were aligned and concatenated with the anvio software [45, 46], using muscle as alignment tool [60]. The alignments are available as Supplementary Material ([keeper.mpdl.mpg.de/library/a5b76ef5-0a9f-475e-9ed1-602c9c70ba03/Benito\\_Merino\\_Hadarchaea/Extended\\_data\\_alignments](https://keeper.mpdl.mpg.de/library/a5b76ef5-0a9f-475e-9ed1-602c9c70ba03/Benito_Merino_Hadarchaea/Extended_data_alignments)). Maximum likelihood trees for all protein sets with 100 bootstraps were calculated using IQTree v. 2.0.3, using the  $-\text{test}$  option to estimate the best substitution model for each protein [61, 62]. The phylogenetic trees were visualized and edited on the Interactive Tree of Life web server [63].

## Results

### Enrichment of Hadarchaea from Guaymas Basin sediments

We obtained sediment cores from a hydrothermally vented area in Guaymas Basin covered by sulfur-oxidizing microbial mats [37]. According to 16S rRNA gene sequencing (Fig. 1A), the main archaeal lineages in the sediment core from cruise AT37-06 are ANME-1 ( $\sim 25\%$  relative abundance of archaeal 16S rRNA gene amplicons), *Thermoplasmatota* ( $\sim 30\%$  relative abundance), *Methanofastidiosales* ( $\sim 20\%$  relative abundance), and *Woesearchaeales* ( $\sim 10\%$  relative abundance). The most abundant bacteria were SRB *Desulfobacterota* ( $\sim 30\%$  relative abundance of bacterial 16S rRNA gene amplicons) and *Campylobacteriales* ( $\sim 30\%$  relative abundance).

Anoxic sediment slurries in sulfate-reducer medium were supplemented with hexadecane as sole energy source and incubated at 37, 50, and 70°C. The cultures at 37 and 50°C showed relatively slow increase of sulfide, reaching  $\sim 5$  mM after 150 days (Fig. 1B). They contained mostly sulfate-reducing *Desulfobacterota* (Fig. 1A) (formerly *\*Deltaproteobacteria*). These have been described before as alkane degraders in marine hydrocarbon seeps [64, 65]. Also, these enrichments contained large proportions of Ca. *Thermopfundales* (phylum *Thermoplasmatota*) and *Woesearchaeales* (phylum *Nanoarchaeota*), as well as some methyl-reducing hydrogenotrophic methanogens of the order *Methanofastidiosales*, all corresponding to the groups that were present in the original sediments (Fig. 1A).

The incubation at 70°C produced 10 mM sulfide in 80 days and continued being active after a 1/5 dilution (Fig. 1B). The archaeal amplicons consisted mostly of *Hadarchaeales*, *Archaeoglobales*, and *Thermoplasmatota* (JdFR-43) (Fig. 1A). All three groups were rare or absent in the control incubations at 70°C without hexadecane, or in incubations with hexadecane at lower temperatures. *Archaeoglobales* is an order that contains free-living sulfate reducers. *A. fulgidus* was suggested to grow on hexadecane as carbon and electron source and to activate this substrate via alkylsuccinate synthases of bacterial origin [66]. The JdFR-43 family has been found in hydrothermal vents and is thought to utilize proteins and peptides for growth [67]. Also, at 70°C, most of the bacterial 16S rRNA gene amplicons were different from the lower temperature enrichments and comprised

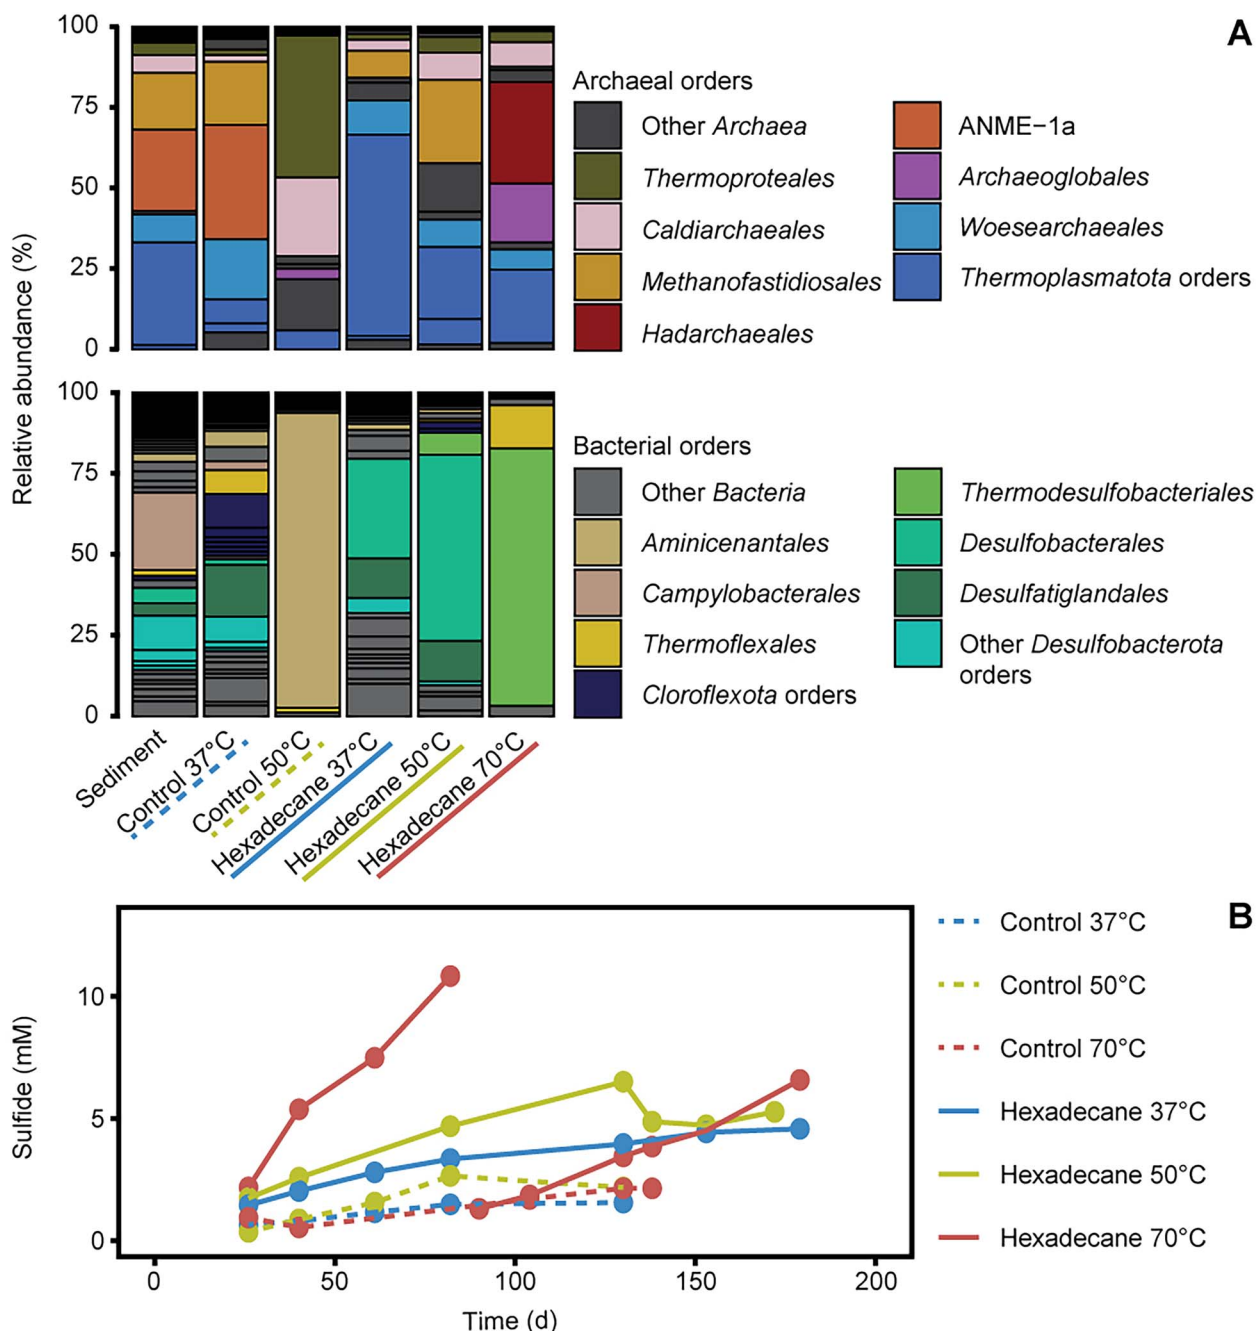

**Figure 1.** Community composition and sulfide formation in sediment slurries incubated with hexadecane; the results correspond to cruise AT37-06; (A) community composition based on archaeal and bacterial 16S rRNA gene amplicons; (B) sulfide production in early enrichments and control incubations; control incubations did not show significant sulfide production over time; enrichments with hexadecane at 37°C and 50°C showed slow activities; enrichments at 70°C grew faster and were diluted after 90 days of incubation.

*Thermodesulfobacteriales* (Fig. 1). *Thermodesulfobacteria* are often autotrophs or grow on small organic molecules and are not known to degrade hydrocarbons [68–71]. However, they have been described recently as partners for thermophilic ANME-1c in the anaerobic oxidation of methane (AOM) and of *Ca. Alkanophaga* in the anaerobic oxidation of midchain alkanes, respectively [5, 16].

After two 1/5 dilutions, the 70°C cultures from the AT37-06 cruise were almost sediment-free. We sequenced three metagenomes at different cultivation stages to resolve its hexadecane-degrading community. Based on 16S rRNA genes recruited from the metagenomes, the cultures were dominated by *Archaea* (>85% relative abundance, Fig. 2). The early phase of

the enrichments was characterized by dominance of *Archaeoglobi* (30% relative abundance), followed by *Bathyarchaeia* and *Hadarchaeota* (15%–25% relative abundance; Fig. 2). *Acetothermia* and *Thermodesulfobacteriales* sequences composed most of the bacterial fraction of the metagenome. In later culture dilutions, a shift occurred between *Archaeoglobi* and *Hadarchaeota*, with the latter becoming the most abundant group (40%–50% relative abundance), suggesting its involvement in hexadecane degradation. This enrichment consist of only two *Hadarchaeota* species as indicated by the 16S rRNA genes found in the metagenomes (Supplementary Fig. S2). We obtained similar results in an enrichment culture from a later cruise (AT42-05, Fig. 2).

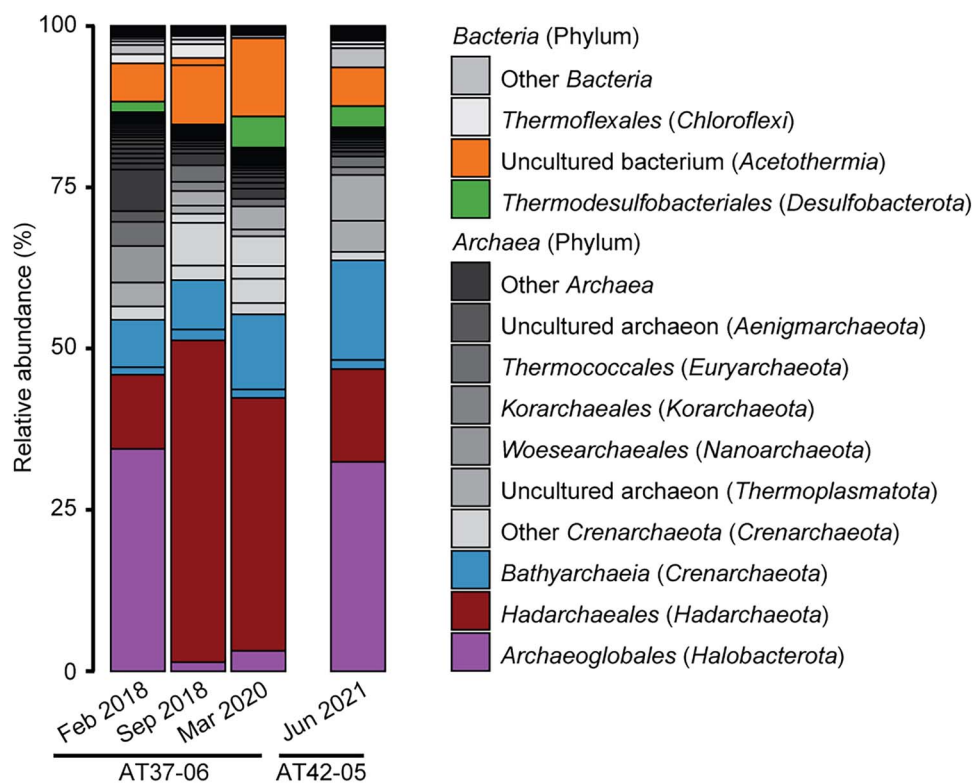

**Figure 2.** Community composition in Hexadecane70 cultures from AT37-06 to AT42-05; relative abundance of microbial taxa based on 16S rRNA gene fragments recruited from the metagenome; archaea dominate thermophilic alkane-degrading enrichments; Archaeoglobales were abundant in early sediment enrichments from the AT37-06 cruise (February 2018), and Hadarchaea became more dominant in later stages (September 2018, March 2020); the communities include heterotrophic *Bathyarchaeia* and *Acetothermia*, and sulfate-reducing *Thermodesulfobacteriales*; a second enrichment attempt from cruise AT42-05 showed similar results.

From the metagenomic coassembly, we reconstructed 39 medium- to good-quality MAGs (completeness >50%, redundancy <10%, [Supplementary Table S3](#)). A *Hadarchaeota* MAG recruited ~18% of the metagenomic reads in the latest stage of the culture (91% completeness, 0% redundancy [Table 1](#)). This MAG encodes the only Acr operon present in the metagenome ([Supplementary Table S4](#)), leading to the hypothesis that these archaea may degrade hexadecane. Wang *et al.* described an Acr-encoding *Hadarchaeota* clade based on MAGs reconstructed from environmental metagenomes [23]. Here, we describe a *Hadarchaeota* MAG in our culture affiliated with this Acr-encoding *Hadarchaeota* clade. The ANI between our *Hadarchaeota* MAG and the rest of the clade is below 75% ([Supplementary Fig. S3](#)). The ANI value of our MAG is also below 75% with the placeholder genome *Ca. Hadarchaeum yellowstonense* [25, 72]. The hexadecane70 *Hadarchaeota* MAG represents a novel genus. Based on its affiliation to *Hadarchaeota* and its metabolism (see results below), we propose the species name *Ca. Cerberiarchoeum oleivorans* (see [Supplementary Text](#)).

### Function of Acr in *Ca. Cerberiarchoeum oleivorans* and Acr phylogeny

The genome of *Ca. C. oleivorans* harbors a single complete Acr operon. Based on the phylogenetic comparison of the catalytic alpha subunit, the Acr of *Ca. C. oleivorans* is closely related to those in MAGs of *Bathyarchaeia*, *Ca. Helarchaeales*, and *Ca. Methanoliparia* ([Fig. 3A](#)) [17-20, 22, 23]. To investigate the capacity of *Ca. C. oleivorans* to activate hexadecane with Acr, we analyzed culture extracts from the hexadecane70 culture via liquid chromatography coupled to high-resolution mass spectrometry

([Supplementary Fig. S1](#)). A peak with the exact mass of hexadecyl-CoM eluted at the same retention time as an authentic hexadecyl-CoM standard ([Fig. 3B](#)). A second peak eluted shortly before the hexadecyl-CoM standard. We hypothesize that this second compound is the product of hexadecane activation in the second carbon (2-methyl-pentadecyl-CoM, C<sub>2</sub>-substituted hexadecyl), as previously described for the activation of butane (C<sub>4</sub> alkane) and dodecane (C<sub>12</sub> alkane) [4, 5]. In *Ca. C. oleivorans*, hexadecyl-CoM is the product of the activation of *n*-hexadecane by the Acr, as described for the anaerobic short- and midchain ANKA *Ca. Ethanoperedens*, *Ca. Syntrophoarchaeum*, and *Ca. Alkanophaga* [4, 6, 7].

### Complete alkane oxidation in *Ca. Cerberiarchoeum oleivorans*

Following Acr-dependent hexadecane activation, a conversion of hexadecyl-CoM to a hexadecanoyl-CoA (CoA-bound fatty acid) is necessary for the complete oxidation of the alkane ([Fig. 3C](#)). This mechanism is so far unknown, but for the related short-chain alkane oxidizers, candidate enzymes have been proposed based on metagenomic and metatranscriptomic data [4, 6, 7]. *Ca. Syntrophoarchaeum butanivorans* encodes a methylcobamide:CoM methyltransferase/corrinoid methyltransferase (*MtaAC*) that could be involved in the conversion of butyl-CoM into butyryl-CoA [4]. However, *Ca. C. oleivorans* MAG does not have the *mtaAC* genes. For *Ca. Ethanoperedens thermophilum*, a tungsten-containing aldehyde:ferredoxin oxidoreductase (*Aor*) has been proposed to catalyze this conversion, based on the high expression of the gene in metatranscriptomes [6]. *Ca. C. oleivorans* encodes three copies of tungsten-containing *Aor* ([Supplementary Table S5](#)).

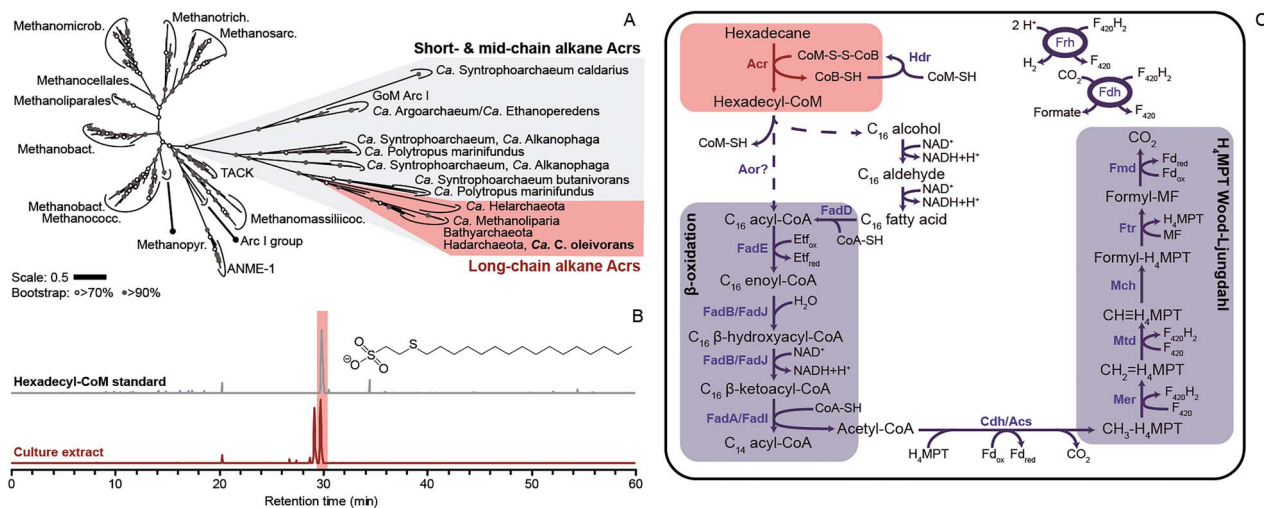

**Figure 3.** Methyl-/alkyl-coenzyme M reductase phylogeny, hexadecane activation by Acr, and proposed metabolism for *Ca. C. oleivorans*; (A) ML likelihood tree of McrA/AcrA alignment with 100 bootstraps; white circles and gray circles show bootstrap values of >70% and >90%, respectively; the clades shaded in gray include all Acr sequences (Mcr Group IV) [105]; the clade of putative long-chain alkane Acrs includes the Acr of *Ca. C. oleivorans*; (B) *Ca. C. oleivorans* activates hexadecane to hexadecyl-CoM. LC-MS analysis of hexadecane70 culture extracts shows two dominant chromatographic peaks in extracted ion chromatograms of the exact mass of hexadecyl-CoM; these peaks likely represent coenzyme M-substituted alkyls resulting from activation of the alkane in the secondary and primary position, in order of elution time [5]; (C) metabolic model for *Ca. C. oleivorans*; the Acr activates hexadecane to hexadecyl-CoM, which is then converted into a 16-carbon acyl-CoA (hexadecanoyl-CoA), possibly via Aor; acyl-CoA is processed to acetyl-CoA units ( $\beta$ -oxidation pathway); acetyl-CoA is incorporated into the downstream part of the  $H_4$ MPT mWL via the Cdh/Acs complex; the methyl group is completely oxidized to  $CO_2$ ; the fate of the electrons released from this metabolism is unknown;  $F_{420}H_2$  oxidation could be coupled to the production of  $H_2$  via Frh or to the reduction of  $CO_2$  to formate by an Fdh.

The function of these Aors in hexadecane degradation needs confirmation via metatranscriptomics. Due to low amounts of available culture, metatranscriptome analysis was impossible.

For *Ca. Ethanoperedens* and *Ca. Syntrophoarchaeum*, the formation of acyl-CoA from the corresponding fatty acid (acetate and butyrate) is not possible, because they do not encode acyl-CoA synthetases. By contrast, *Ca. C. oleivorans* encodes acyl-CoA synthetases (*fadD*) and alcohol dehydrogenases. Therefore, *Ca. C. oleivorans* could use long-chain fatty acids or alcohols as carbon and energy source apart from long-chain alkanes. This ability was also suggested for *Ca. Polytropus mariniifundus* [21] and *Ca. Methanoliparia* [17]. Furthermore, *Ca. C. oleivorans* encodes a complete  $\beta$ -oxidation pathway, with genes present in multiple copies for several of the steps of the pathway (Supplementary Table S6). The  $\beta$ -oxidation pathway allows the production of eight acetyl-CoA units from hexadecanoyl-CoA. Most Hadarchaea (including *Ca. C. oleivorans*) encode a gluconeogenesis pathway and the  $C_3$ -module of the glycolysis pathway for synthesis of sugars and central building blocks, respectively (Supplementary Table S7). However, none of the Hadarchaea encode a complete citric acid cycle or reductive citric acid cycle (Supplementary Table S7). In *Ca. C. oleivorans*, acetyl-CoA can be completely oxidized to  $CO_2$  via the CdhABCDE/acetyl-CoA synthase (Cdh/Acs) complex and the methanogenesis enzymes upstream of methyl transferase (Mtr), i.e. the tetrahydromethanopterin ( $H_4$ MPT) methyl branch of the WL (mWL) pathway. In incubations of the enrichment cultures with  $^{13}C$ -labeled hexadecane, we measured significant production of  $^{13}CO_2$  over time (Supplementary Fig. S4). In total, 16  $CO_2$  molecules are formed per each molecule of hexadecane, according to the following equation:

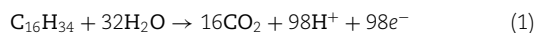

The liberated electrons would reduce molecules such as coenzyme  $F_{420}$ , ferredoxin,  $NAD^+$ , and flavoproteins, which need to

be reoxidized in respiratory pathways, or transfer their electrons to a syntrophic partner. In our culture, alkane degradation is likely coupled to sulfate reduction. Similar to other Hadarchaea containing Acrs, *Ca. C. oleivorans* does not encode a sulfate reduction pathway. Other syntrophic ANKA produce large amounts of MHC that are likely mediating interspecies electron transfer (DIET) [4, 6, 13, 14]. *Ca. C. oleivorans* does not encode genes for MHC. Instead, it might channel the reducing equivalents in the form of molecular hydrogen produced by an  $F_{420}$ -reducing NiFe-hydrogenase, or transfer small, reduced compounds like acetate and formate. Although the fermentation of hexadecane into hydrogen or acetate is unfavorable at deep-sea conditions ( $\Delta G = 753.3$  kJ or 133.9 kJ, respectively), the reactions could become feasible if syntrophic partners keep the concentrations of these compounds at low levels [73].

### Possible sulfate-reducing partners and additional associated microorganisms

We observed a good mass balance for the coupling of  $CO_2$  formation to sulfate reduction in the *Ca. C. oleivorans* culture (Supplementary Fig. S4A and Supplementary Text). We screened the other MAGs retrieved from the hexadecane70 culture with a focus on potential sulfate-reducing partner for *Ca. C. oleivorans* (Table 1 and Supplementary Table S3). Thermophilic ANME and their relatives *Ca. Alkanophaga* couple with *Thermodesulfobacteria* (phylum *Desulfobacterota*) to perform AOM and anaerobic oxidation of petroleum alkanes, respectively [5, 16]. *Thermodesulfobacteria* were present throughout the different stages of the hexadecane70 culture (Fig. 2). We retrieved a *Thermodesulfobacteriales* MAG in hexadecane70 metagenomes, present in low abundances (1%–2% metagenomic reads map to the MAG, Supplementary Table S3). This MAG corresponds to the species *Ca. Thermodesulfobacterium torris*, described as a partner for AOM at 70°C [16]. *Ca. T. torris* encodes several putative MHC that may be involved in DIET with *Ca. C. oleivorans*, alternatively to our first

**Table 1.** MAGs retrieved from hexadecane70 culture metagenomes (described in the main text); a complete list of MAGs can be found in Supplementary Table S3.

|                                               | Genome size (Mb) | N50 (kb) | Num. Contigs | GC content (%) | Completeness (%) | Redundancy (%) | Read recruitment Feb 2018 (%) | Read recruitment Mar 2020 (%) | Closest GTDB relative |
|-----------------------------------------------|------------------|----------|--------------|----------------|------------------|----------------|-------------------------------|-------------------------------|-----------------------|
| <i>Candidatus</i> Cerberiarchaenum oleivorans | 1.3 Mb           | 44 kb    | 54           | 52             | 91               | 0              | 3                             | 18                            | GCA_004347925.1       |
| <i>Bipolaricaulota</i> bacterium S4B7_HD70    | 1.8 Mb           | 51 kb    | 85           | 62             | 79               | 0              | 2                             | 6                             | GCA_002010385.1       |
| <i>Bathyarchaeia</i> archaeon S9B4_HD70       | 1.7 Mb           | 1.7 Mb   | 1            | 34             | 96               | 0              | 1                             | 3                             | GCA_002254975.1       |
| <i>Archaeoglobi</i> archaeon S5B11_HD70       | 0.9 Mb           | 15 kb    | 82           | 46             | 68               | 0              | 5                             | <1%                           | <i>A. fulgidus</i>    |
| <i>Archaeoglobi</i> archaeon S5B4_HD70        | 2.2 Mb           | 27 kb    | 142          | 45             | 97               | 3              | 5                             | <1%                           | <i>A. fulgidus</i>    |

hypothesis of H<sub>2</sub> transfer. Despite their low abundances in the total community metagenome, *Thermodesulfobacteria* are a likely partner SRB for hexadecane degradation at 70°C. In the cultures, we visualized microbial aggregates containing *Hadarchaeota* cells (Supplementary Fig. S5). This suggests that *Ca. C. oleivorans* relies on DIET or transfer of small molecules to a syntrophic partner for the degradation of hexadecane.

In early enrichments, *Archaeoglobi* were highly abundant (Figs 1 and 2) and several MAGs recruit between 1% and 10% of metagenomic reads (Table 1 and Supplementary Table S3). The *Archaeoglobi* MAGs S5B4\_HD70 and S5B11\_HD70 encode a complete dissimilatory sulfate reduction pathway (Table S5) and are related to *A. fulgidus* (Supplementary Figs S6 and S7). The cultured species of the genus *Archaeoglobus* are heterotrophic or chemolithotrophic sulfate reducers [74–83]. Other *Archaeoglobi* genera (namely *Ferroglobus*, *Geoglobus* and *Ca. Polytropus*) are nitrate and ferric iron reducers [21, 84–86]. We considered whether *Archaeoglobi* from the hexadecane70 culture could receive reducing equivalents from *Ca. C. oleivorans*. However, the *Archaeoglobi* do not encode hydrogenases, making interspecies hydrogen exchange with *Ca. C. oleivorans* unlikely. They also do not code for putative MHC. We thus suggest that *Archaeoglobi* in our culture could be competitive hexadecane oxidizers using alkylsuccinate synthases (Ass), a bacterial mechanism for activation of alkanes [87]. *A. fulgidus* has been isolated from hydrothermal vents and oil reservoirs [88] and encodes a pyruvate formate lyase (Pfl) with high similarity to alkylsuccinate synthase A (AssA) and benzylsuccinate synthase A (BssA) [66]. All *Archaeoglobi* MAGs retrieved encode proteins with high similarity to Pfl/Ass that were highly expressed in *A. fulgidus* during growth on hexadecane ([66], Supplementary Fig. S8). Interestingly, one *Archaeoglobus* MAG (*Archaeoglobi* archaeon S5B9\_HD70, 83% completeness, 4% contamination, Supplementary Table S3) encodes both a PflC/AssD and PflD/AssA with high sequence similarity to those of *A. fulgidus* and *D. alkenivorans*. This is the only MAG in the hexadecane70 cultures with the capacity to couple alkane oxidation to sulfate reduction within one cell (Supplementary Table S4). However, the abundance of the *Archaeoglobi* archaeon S5B9\_HD70 MAG is below 0.1% in the later stages of cultivation (Supplementary Table S3). In summary, the *Archaeoglobi* of the hexadecane70 culture are unlikely to play a role as partners of *Ca. C. oleivorans*. Instead, they might compete for the oxidation of the hexadecane coupled to sulfate reduction, especially at the beginning of the cultivation.

The culture also contains a bacterial MAG affiliated to the phylum *Bipolaricaulota* (formerly *\*Acetothermia*) that recruited 2%–6% of the metagenomic reads (Table 1). *Bipolaricaulota* have been found in anoxic environments such as oil reservoirs and anaerobic digesters [89, 90]. These bacteria are described as generalists that ferment sugars, amino acids, and peptides to acetate, formate, and hydrogen [89, 91], but do not encode MHC. In the culture, we also found a *Bathyarchaeia* MAG (phylum *Thermoproteota*) that recruited 1%–3% of the metagenomic reads (Table 1). *Bathyarchaeia* are found in diverse environments such as deep-sea and freshwater sediments [92–95]. Evans *et al.* described an environmental *Bathyarchaeia* MAG that encoded an Acr [20]. To our knowledge, no other Acr-encoding *Bathyarchaeia* have been found since then. The *Bathyarchaeia* MAG present in our culture is unlikely to be involved directly in hexadecane oxidation. Furthermore, a MAG belonging to *Ca. Thermopfundales* (completeness <70%) recruits 1%–2% of metagenomic reads (Supplementary Table S3). *Ca. Thermopfundales* are peptidolytic organisms that have been reported from hydrothermal environments and oil reservoirs and also

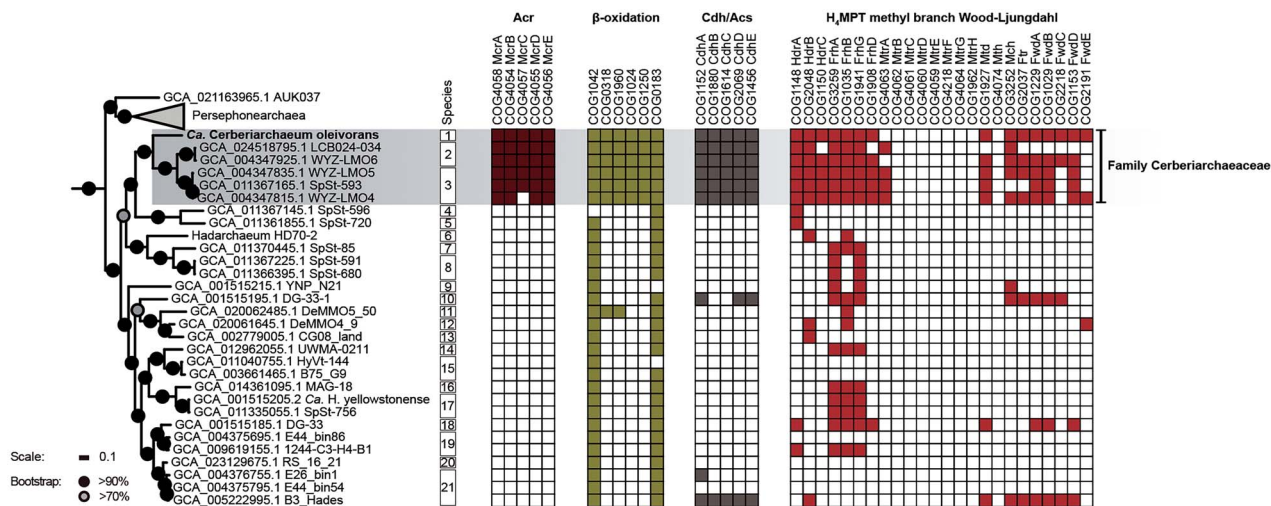

**Figure 4.** Pathways required for Acr-dependent alkane oxidation in *Hadarchaeota*; subset of a phylogenomic tree of archaea showing *Hadarchaeota* (including Persephonarchaea), and occurrence of pathways for alkane degradation in the class *Hadarchaeia*; the 95% threshold in ANI defines the 21 species of *Hadarchaeota*; colored squares indicate that the protein is encoded in the MAG; the *Ca. Cerberiarthaeaceae* family (shaded in the tree) contains MAGs encoding an Acr, a complete  $\beta$ -oxidation pathway, a Cdh/Acs, and a mWL pathway without methyl-H<sub>4</sub>MPT:CoM methyltransferase (Mtr); the COGs in the  $\beta$ -oxidation pathway correspond to NDP-forming acyl-CoA synthetase (COG1042), AMP-forming acyl-CoA synthetase (COG0318), acyl-CoA dehydrogenase (COG1960), enoyl-CoA hydratase (COG1024), 3-hydroxyacyl-CoA dehydrogenase (COG1250), and acetyl-CoA acetyltransferase (COG0183).

co-occurring with *Hadarchaea* [67]. The *Bipolaricaulota*, *Bathylarchaeia*, and *Ca. Thermoprofundales* MAGs described here appear to be heterotrophic generalists that might thrive on side metabolites of the alkane-oxidizing community such as peptides, acetate, or formate [96, 97]. None of these MAGs encode for sulfate reduction genes, nor have they been previously reported as partners for AOM or anaerobic oxidation of alkanes. Overall, this community gives us insights on the complex metabolic networks that potentially operate in oil-rich environments.

### Origin of alkane metabolism in *Hadarchaea*

To investigate the evolutionary history of Acr-based alkane metabolism in the *Hadarchaeota*, we first determined the distribution of Acr,  $\beta$ -oxidation, and WL pathway genes in this class (Fig. 4). As previously mentioned, these pathways are necessary for short- and midchain alkane-oxidation in *Ca. Syntrophoarchaeum* and *Ca. Alkanophaga* [4, 5], and long-chain alkane oxidation coupled to methanogenesis in *Ca. Methanoliparia* [17–19]. All *Hadarchaea* MAGs coding for an Acr are gathered in a single family (Fig. 4) corresponding to WYZ-LMO6 in GTDB [31], for which we propose the name *Ca. Cerberiarthaeaceae*. All MAGs from this family have a complete or almost complete pathway for alkane oxidation, including genes for  $\beta$ -oxidation, both branches of the WL pathway and HdrABC genes for the regeneration of CoM-CoB. Only two other *Hadarchaeota* outside of *Ca. Cerberiarthaeaceae* encode an almost complete WL pathway. To determine the origin of alkane oxidation in the *Hadarchaea*, we built a reference phylogeny of archaea and compared it to the phylogeny of enzymes of the two branches of the WL pathway (Fig. 5). In the archaeal phylogeny, Persephonarchaea and *Hadarchaea* form a monophyletic clade, branching next to Theionarchaea (Fig. 5). The Persephonarchaea (formerly candidate division MSBL1) [98] are an uncultured group described from hypersaline anoxic basins [99]. All the Persephonarchaea MAGs have completion values of <50%. Based on our GTDB taxonomy analysis, Persephonarchaea is a sister group to the *Hadarchaea*, comprised within the phylum

*Hadarchaeota* and the class *Hadarchaeia* (Supplementary Table S2). Therefore, we use the term “*Hadarchaea*” to refer to the order *Hadarchaeales* excluding the Persephonarchaea. The Theionarchaea are described from estuary sediments and are affiliated with the *Thermococci* (Supplementary Table S2) [98, 100]. The phylogenies of the enzymes of the mWL pathway, i.e. FwdABC (Fig. 5B), formylmethanofuran—H<sub>4</sub>MPT N-formyltransferase (Ftr; Supplementary Fig. S9), and methenyl-H<sub>4</sub>MPT cyclohydrolase (Mch; Supplementary Fig. S9), are mostly congruent with the reference phylogeny of *Archaea* (Fig. 5A), supporting the results of previous phylogenies [101]. In particular, the *Hadarchaea*, *Persephonarchaea*, and *Theionarchaea* clades are closely related and form a separate clade from the *Bathylarchaeia* and *Asgardarchaeota* in Fwd and Mch phylogenies, similarly to the reference tree (Fig. 5 and Supplementary Fig. S9). Altogether, this indicates that the mWL pathway was likely vertically inherited in the *Hadarchaeota*. By contrast, for the carbonyl branch of the WL pathway (i.e. ml CdhABCDE), *Ca. Cerberiarthaeaceae* sequences are distantly related to those of Persephonarchaea and *Theionarchaea* and branch within the *Bathylarchaeia* (Fig. 5C). Very similar results were obtained for phylogenies based on individual Fwd and Cdh subunits (Figs S10 and S11). Therefore, *Hadarchaea* most likely acquired the carbonyl branch of WL by HGT from *Bathylarchaeia*. The Acr from *Hadarchaeota* are closely related to sequences from two other groups, *Bathylarchaeia* and *Halobacterota* (*Ca. Methanoliparia*), suggesting HGT between these lineages, but it is not possible to conclude on the direction of the transfer. Based on BLASTp comparisons, the  $\beta$ -oxidation genes of *Ca. C. oleivorans* are also related to those of putative long-chain alkane oxidizers from phylogenetically distant lineages, such as *Bathylarchaeia* BA1/BA2 and *Ca. Methanoliparia* (Supplementary Table S6) [17, 20]. Similarly to Acr, this supports the existence of HGT between these lineages.

### Discussion

Before this study, *Hadarchaeota* was a phylum described exclusively from environmental MAGs, and no physiological studies



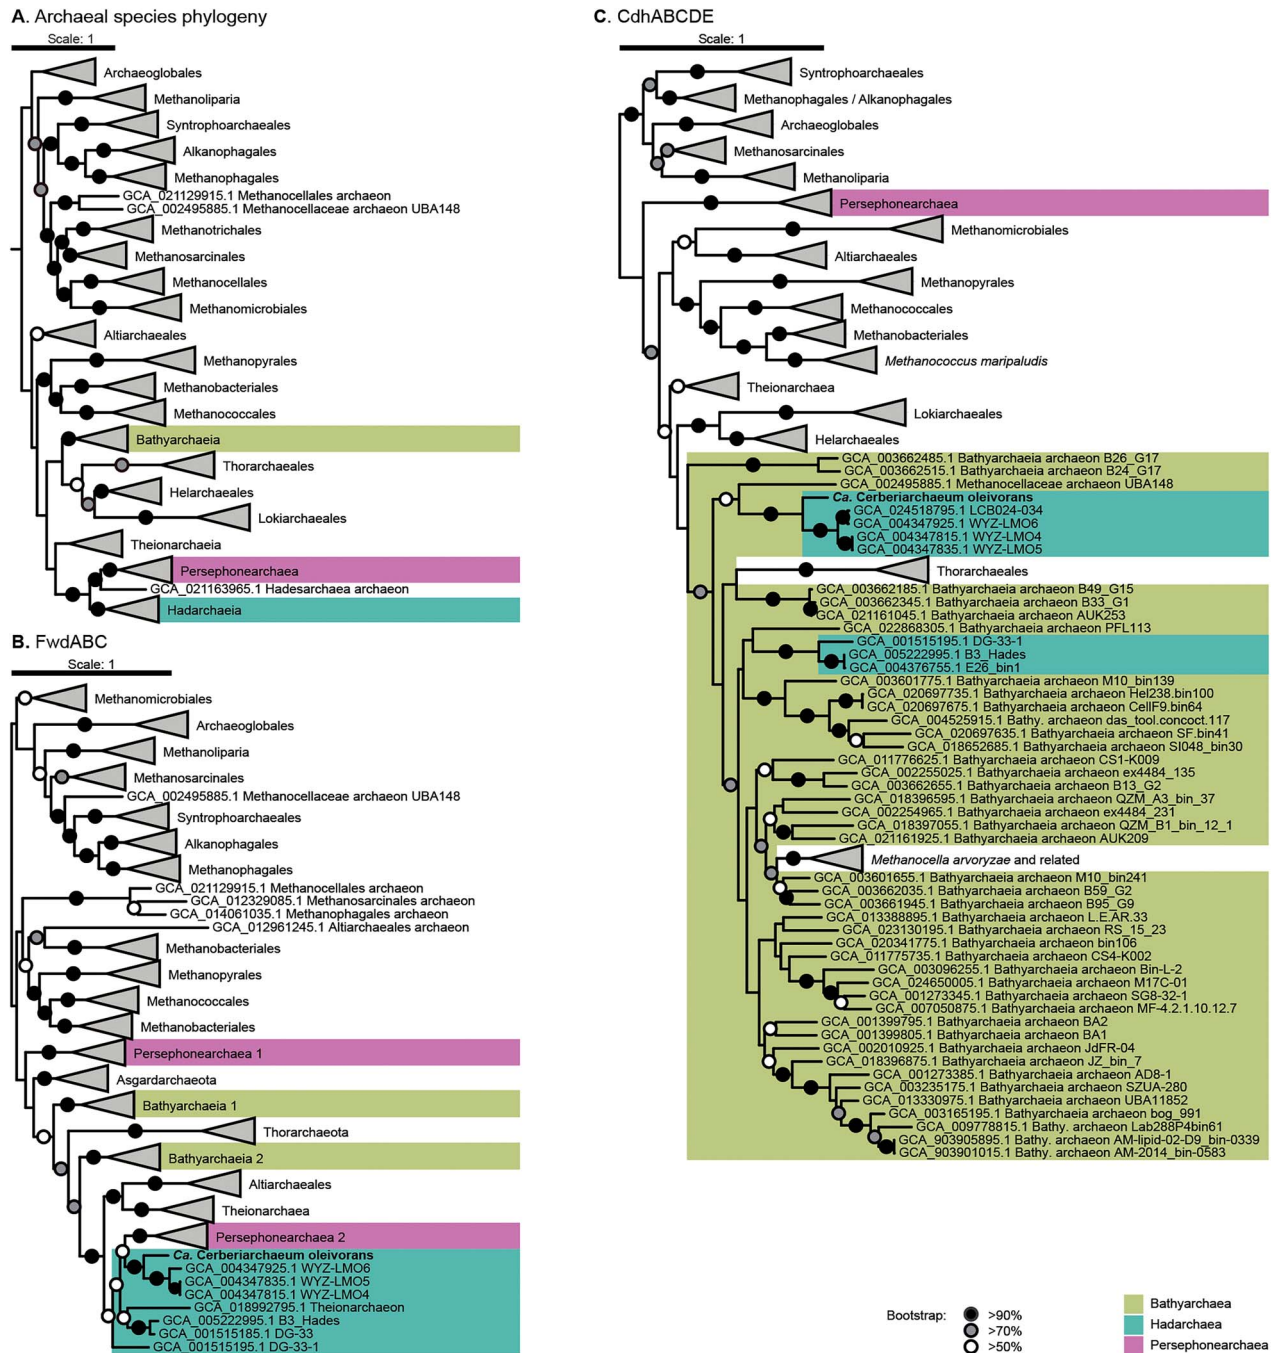

**Figure 5.** Placement of Hadarchaea, Persephonarchaea, and Bathyarchaea in species genome tree, FwdABC phylogeny, and CdhABCDE/acetyl-CoA synthase complex (Cdh) phylogeny; maximum-likelihood phylogenetic trees with 100 bootstraps based on concatenated alignment of 38 archaeal marker genes, FwdABC, and CdhABCDE protein sequences; (A) Hadarchaea and Persephonarchaea form a clade next to Theionarchaea; (B) Hadarchaea Fwd sequences form a branch with the Persephonarchaea 2 sequences; (C) Cdh sequences from the alkane-oxidizing Hadarchaea clade cluster together and branch from Bathyarchaea sequences, probably as a consequence of an event of lateral gene transfer between subsurface alkane-oxidizing archaea.

were available to link their genomic potential with their ecological niches. Based on environmental MAGs and 16S rRNA sequences, Hadarchaea are present in a broad range of subsurface anoxic environments, and they are associated with methane seeps and oil-rich environments (Supplementary Fig. S12). The presence of genes for CO and H<sub>2</sub> metabolism supports their competitiveness in such environments [25, 102]. Furthermore, Hadarchaea are likely thermophiles, suggested, for example, by the extremely high frequency of G-quadruplex-prone regions in their DNA [103].

Predictions on optimal growth temperatures based on Hadarchaea MAGs showed that they are adapted to temperatures between 50 and 82°C (Supplementary Table S7). Most Hadarchaea lack the WL pathway (Fig. 4). Although *Ca. Cerberiararchaeaceae* might use the WL pathway for carbon assimilation, other Hadarchaea might assimilate carbon via the reductive pentose phosphate cycle (Supplementary Table S7). Subsurface Hadarchaea might couple the oxidation of carbon monoxide to the reduction of H<sub>2</sub>O to hydrogen or to dissimilatory nitrite

reduction to ammonia, as proposed for Hadarchaea MAGs from Yellowstone [25]. The predominant metabolism in deep anoxic and oil-rich environments might be fermentation of organic compounds, rather than respiration [73]. The metabolism of non-ANKA Hadarchaea remains poorly understood without cultured representatives and further environmental mapping. The results of our enrichment study, together with other environmental data [23], now explain their presence in oil seeps and reservoirs. The genomic data along with the analysis of metabolites suggest that *Ca. C. oleivorans* uses an Acr to activate hexadecane to hexadecyl-CoM and can potentially oxidize the alkane completely to CO<sub>2</sub>, supporting the proposed hypothesis for Acr-based alkane oxidation in Hadarchaea [23].

This study of an enrichment culture of *Ca. C. oleivorans* suggests that it does not encode respiratory pathways or other electron sinking mechanisms. Syntrophic interactions based on transfer of molecular hydrogen or formate have been proposed [104]. The most likely partner SRB in our culture is a *Thermodesulfobacterium*, as previously proposed for AOM and midchain alkane oxidation at 70°C [5, 16]. Further cultivation efforts are needed to decipher this potential interaction between Hadarchaea and *Thermodesulfobacteria* aided by metatranscriptomics, physiological experiments, and microscopy.

In the Mcr/Acr phylogeny, we can distinguish four groups [8, 105]. Group I contains Mcrs from CO<sub>2</sub>-reducing methanogens and Group II corresponds to methyl-reducing methanogens. Groups I and II also contain Mcrs involved in AOM. Group III contains TACK-like Mcr sequences from *Ca. Verstraetearchaeota*, *Ca. Nezharchaeota*, *Ca. Korarchaeota*, *Thaumarchaeota* and *Archaeoglobi* [23, 106–109]. Group IV is a monophyletic clade including all Acrs. As the Acr of *Ca. Polytropus marinifundus* is closely related to those of short- and medium-chain alkane-oxidizing archaea [4–7], we can infer that *Ca. Polytropus marinifundus* uses its Acr to activate alkanes within the range C<sub>3</sub>–C<sub>14</sub>, based on Acr phylogeny (Fig. 3A) [21]. Based on the results of Zhou et al. [19] and our hexadecane/70 enrichments, Acrs from the Hadarchaea/*Ca. Methanoliparia* clade are all likely responsible for the activation of long-chain alkanes (Fig. 3A). Whether long-chain alkane Acrs are a monophyletic group should be investigated following cultivation of *Bathyarchaeia* and *Ca. Helarchaeales* from hydrocarbon-rich environments [20, 22].

We investigated the occurrence of pathways for Acr-based long-chain alkane oxidation in other *Hadarchaeota* MAGs available in public databases. Neither the WL pathway, nor the  $\beta$ -oxidation pathway are present in *Hadarchaeota* genomes outside of the *Ca. Cerberiarchoaeaceae*, with the exception of two MAGs that encode an almost complete WL pathway (DG-33-1 and B3\_Hades, Fig. 4). In absence of the  $\beta$ -oxidation pathway and Acr, these two organisms might use this WL pathway for CO<sub>2</sub> fixation.

Previous studies suggested that Acr-based alkane-oxidation was transferred multiple times via HGTs in *Archaea*, but the direction of these transfers could not be resolved for most of the enzymes [24]. However, we found that *Ca. Cerberiarchoaeaceae* likely acquired the carbonyl branch of the WL pathway through HGT from *Bathyarchaeota*, similarly to what had already been proposed for *Methanocella arvoryzae* [59]. Because this step is likely mandatory for the Acr-based alkane-oxidation, this transfer indicates that the last common ancestor of *Hadarchaeota* was likely not an ANKA and that this metabolism was acquired by HGT, at the base of the *Ca. Cerberiarchoaeaceae*. In this context, other steps of the Acr-based alkane-oxidation could have been gained by HGT in *Ca. Cerberiarchoaeaceae*, and in particular Acr and the  $\beta$ -oxidation pathway. These genes might have been horizontally acquired

from *Bathyarchaeia* and/or *Ca. Methanoliparia* also dwelling in subsurface hydrothermal and oil-rich environments. By contrast, the mWL was vertically inherited from the LACA to *Hadarchaeota* but was lost in members of the phylum lacking the pathway.

Overall, our study highlights the need to sample new locations and to use cultivation-based approaches to understand the extension, evolution, and physiology of Acr-based alkane metabolism in Hadarchaea and other archaea from extreme environments.

## Acknowledgements

We thank Andreas Teske and the scientific party and the crews of RV Atlantis missions AT37-06 and AT42-05 with submersible Alvin for their outstanding work. We thank Halina Tegetmeyer for amplicon sequencing and Matthew Schechter for preliminary analyses. We thank Katrin Knittel for assistance in CARD-FISH probe preparation and troubleshooting. We thank Heidi Taubner and Marcus Elvert for assistance in stable isotope measurements. Furthermore, we thank Mirja Meiners, Susanne Menger and Martina Alisch. for their assistance in laboratory work and cultivation.

## Author contributions

Gunter Wegener and David Benito Merino designed the study. Gunter Wegener retrieved samples on board and established enrichment cultures. David Benito Merino did cultivation, laboratory experiments, and bioinformatics analysis. Guillaume Borrel and David Benito performed phylogenetic analysis. Julius S. Lipp performed LC–MS analyses. David Benito Merino, Gunter Wegener and Antje Boetius wrote the manuscript with contributions of all coauthors.

## Supplementary material

Supplementary material is available at *The ISME Journal* online.

## Conflicts of interest

The authors declare no competing interests.

## Funding

This study was funded by the Max Planck Society and the Deutsche Forschungsgemeinschaft (DFG) under Germany's Excellence Initiative/Strategy through the Cluster of Excellence "The Ocean Floor–Earth's Uncharted Interface" (EXC 2077; project no. 390741603). The Guaymas Basin expeditions were supported by the National Science Foundation, Biological Oceanography (grant no. 1357238) to Andreas Teske (Collaborative Research: Microbial Carbon cycling and its interactions with Sulfur and Nitrogen transformations in Guaymas Basin hydrothermal sediments). Metagenome sequencing was done in the frame of Census of Deep Life Phase 14 call (Deep Carbon Observatory) granted to David Benito Merino and Gunter Wegener.

## Data availability

The 16S rRNA gene amplicons reads, raw metagenomic reads, metagenomic assembly and MAGs generated in this study are accessible under BioProject PRJNA891685.

## References

1. Thauer RK, Kaster AK, Seedorf H et al. Methanogenic archaea: ecologically relevant differences in energy conservation. *Nat Rev Microbiol* 2008;**6**:579–91.
2. Shima S, Krueger M, Weinert T et al. Structure of a methyl-coenzyme M reductase from Black Sea mats that oxidize methane anaerobically. *Nature* 2012;**481**:98–101.
3. Hallam SJ, Putnam N, Preston CM et al. Reverse methanogenesis: testing the hypothesis with environmental genomics. *Science* 2004;**305**:1457–62.
4. Laso-Pérez R, Wegener G, Knittel K et al. Thermophilic archaea activate butane via alkyl-coenzyme M formation. *Nature* 2016;**539**:396–401.
5. Zehnle H, Laso-Pérez R, Lipp J et al. *Candidatus* Alkanophaga archaea from Guaymas Basin hydrothermal vent sediment oxidize petroleum alkanes. *Nat Microbiol* 2023;**8**:1199–212.
6. Hahn CJ, Laso-Pérez R, Vulcano F et al. “*Candidatus* Ethanopere-dens,” a thermophilic genus of archaea mediating the anaerobic oxidation of ethane. *MBio* 2020;**11**:e00600–20.
7. Chen S-C, Musat N, Lechtenfeld OJ et al. Anaerobic oxidation of ethane by archaea from a marine hydrocarbon seep. *Nature* 2019;**568**:108–11.
8. Wang Y, Wegener G, Ruff SE et al. Methyl/alkyl-coenzyme M reductase-based anaerobic alkane oxidation in archaea. *Environ Microbiol* 2021;**23**:530–41.
9. Wegener G, Laso-Pérez R, Orphan VJ et al. Anaerobic degradation of alkanes by marine archaea. *Annu Rev Microbiol* 2022;**76**:553–77.
10. Boetius A, Ravensschlag K, Schubert CJ et al. A marine microbial consortium apparently mediating anaerobic oxidation of methane. *Nature* 2000;**407**:623–6.
11. Michaelis W, Seifert R, Nauhaus K et al. Microbial reefs in the black sea fueled by anaerobic oxidation of methane. *Science* 2002;**297**:1013–5.
12. Orphan VJ, House CH, Hinrichs K-U et al. Multiple archaeal groups mediate methane oxidation in anoxic cold seep sediments. *Proc Natl Acad Sci U S A* 2002;**99**:7663–8.
13. McGlynn SE, Chadwick GL, Kempes CP et al. Single cell activity reveals direct electron transfer in methanotrophic consortia. *Nature* 2015;**526**:531–5.
14. Wegener G, Krukenberg V, Riedel D et al. Intercellular wiring enables electron transfer between methanotrophic archaea and bacteria. *Nature* 2015;**526**:587–90.
15. Krukenberg V, Harding K, Richter M et al. *Candidatus* Desulfofer-vidus auxilii, a hydrogenotrophic sulfate-reducing bacterium involved in the thermophilic anaerobic oxidation of methane. *Environ Microbiol* 2016;**18**:3073–91.
16. Benito Merino D, Zehnle H, Teske A et al. Deep-branching ANME-1c archaea grow at the upper temperature limit of anaerobic oxidation of methane. *Front Microbiol* 2022;**13**:988871.
17. Borrel G, Adam PS, McKay LJ et al. Wide diversity of methane and short-chain alkane metabolisms in uncultured archaea. *Nat Microbiol* 2019;**4**:603–13.
18. Laso-Pérez R, Hahn C, van Vliet DM et al. Anaerobic degradation of non-methane alkanes by “*Candidatus* Methanoliparia” in hydrocarbon seeps of the Gulf of Mexico. *MBio* 2019;**10**:e01814–9.
19. Zhou Z, Zhang C, Liu P et al. Non-syntrophic methanogenic hydrocarbon degradation by an archaeal species. *Nature* 2022;**601**:257–62.
20. Evans PN, Parks DH, Chadwick GL et al. Methane metabolism in the archaeal phylum Bathyarchaeota revealed by genome-centric metagenomics. *Science* 2015;**350**:434–8.
21. Boyd JA, Jungbluth SP, Leu AO et al. Divergent methyl-coenzyme M reductase genes in a deep-subseafloor Archaeoglobi. *ISME J* 2019;**13**:1269–79.
22. Seitz KW, Dombrowski N, Erme L et al. Asgard archaea capable of anaerobic hydrocarbon cycling. *Nat Commun* 2019;**10**:1822.
23. Wang Y, Wegener G, Hou J et al. Expanding anaerobic alkane metabolism in the domain of archaea. *Nat Microbiol* 2019;**4**:595–602.
24. Wang Y, Wegener G, Williams TA et al. A methylotrophic origin of methanogenesis and early divergence of anaerobic multicar-bon alkane metabolism. *Sci Adv* 2021;**7**:eabj1453.
25. Baker BJ, Saw JH, Lind AE et al. Genomic inference of the metabolism of cosmopolitan subsurface archaea, Hadesar-chaea. *Nat Microbiol* 2016;**1**:16002.
26. Takai K, Moser DP, DeFlaun M et al. Archaeal diversity in waters from deep South African gold mines. *Appl Environ Microbiol* 2001;**67**:5750–60.
27. Teske A, Sørensen KB. Uncultured archaea in deep marine subsurface sediments: have we caught them all? *ISME J* 2008;**2**:3–18.
28. Dombrowski N, Teske AP, Baker BJ. Expansive microbial metabolic versatility and biodiversity in dynamic Guaymas Basin hydrothermal sediments. *Nat Commun* 2018;**9**:4999.
29. Probst AJ, Ladd B, Jarett JK et al. Differential depth distribu-tion of microbial function and putative symbionts through sediment-hosted aquifers in the deep terrestrial subsurface. *Nat Microbiol* 2018;**3**:328–36.
30. Dong X, Rattray JE, Campbell DC et al. Thermogenic hydro-carbon biodegradation by diverse depth-stratified microbial populations at a Scotian Basin cold seep. *Nat Commun* 2020;**11**:5825.
31. Rinke C, Chuvochina M, Mussig AJ et al. A standardized archaeal taxonomy for the genome taxonomy database. *Nat Microbiol* 2021;**6**:946–59.
32. Farag IF, Biddle JF, Zhao R et al. Metabolic potentials of archaeal lineages resolved from metagenomes of deep Costa Rica sedi-ments. *ISME J* 2020;**14**:1345–58.
33. Simoneit BRT, Lonsdale PF, Edmond JM et al. Deep-water hydrocarbon seeps in Guaymas Basin, Gulf of California. *Appl Geochem* 1990;**5**:41–9.
34. Rueter P, Rabus R, Wilkest H et al. Anaerobic oxidation of hydrocarbons in crude oil by new types of sulphate-reducing bacteria. *Nature* 1994;**372**:455–8.
35. Teske A, Hinrichs K-U, Edgcomb V et al. Microbial diversity of hydrothermal sediments in the Guaymas Basin: evidence for anaerobic methanotrophic communities. *Appl Environ Microbiol* 2002;**68**:1994–2007.
36. Bazylnski DA, Wirsen CO, Jannasch HW. Microbial utilization of naturally occurring hydrocarbons at the Guaymas Basin hydrothermal vent site. *Appl Environ Microbiol* 1989;**55**:2832–6.
37. Teske A, Wegener G, Chanton JP et al. Microbial commu-nities under distinct thermal and geochemical regimes in axial and off-axis sediments of Guaymas Basin. *Front Microbiol* 2021;**12**:110.
38. Laso-Pérez R, Krukenberg V, Musat F et al. Establishing anaer-obic hydrocarbon-degrading enrichment cultures of microor-ganisms under strictly anoxic conditions. *Nat Publ Gr* 2018;**13**:1310–30.
39. Widdel F, Bak F. *Gram-Negative Mesophilic Sulfate-Reducing Bacte-ria*. *The Prokaryotes*. New York, NY: Springer, 1992, 3352–78.
40. Cord-Ruwisch R. A quick method for the determination of dis-solved and precipitated sulfides in cultures of sulfate-reducing bacteria. *J Microbiol Methods* 1985;**4**:33–6.

41. Callahan BJ, McMurdie PJ, Rosen MJ et al. DADA2: high-resolution sample inference from Illumina amplicon data. *Nat Methods* 2016;**13**:581–3.
42. Gruber-Vodicka HR, Seah BKB, Pruesse E. Phylo flash: rapid small-subunit rRNA profiling and targeted assembly from metagenomes. *mSystems* 2020;**5**:e00920.
43. Bankevich A, Nurk S, Antipov D et al. SPAdes: a new genome assembly algorithm and its applications to single-cell sequencing. *J Comput Biol* 2012;**19**:455–77.
44. Langmead B, Salzberg SL. Fast gapped-read alignment with bowtie 2. *Nat Methods* 2012;**9**:357–9.
45. Eren AM, Esen ÖC, Quince C et al. Anvi'o: an advanced analysis and visualization platform for 'omics data. *Peer J* 2015;**3**:e1319.
46. Eren AM, Kiefl E, Shaiber A et al. Community-led, integrated, reproducible multi-omics with anvi'o. *Nat Microbiol* 2020;**6**:3–6.
47. Hyatt D, Chen G-L, LoCascio PF et al. Prodigal: prokaryotic gene recognition and translation initiation site identification. *BMC Bioinformatics* 2010;**11**:119.
48. Seemann T. Prokka: rapid prokaryotic genome annotation. *Bioinformatics* 2014;**30**:2068–9.
49. Kanehisa M, Goto S. KEGG: Kyoto encyclopedia of genes and genomes. *Nucleic Acids Res* 2000;**28**:27–30.
50. Haft DH, Loftus BJ, Richardson DL et al. TIGRFAMs: a protein family resource for the functional identification of proteins. *Nucleic Acids Res* 2001;**29**:41–3.
51. Lagesen K, Hallin P, Rødland EA et al. RNAmmer: consistent and rapid annotation of ribosomal RNA genes. *Nucleic Acids Res* 2007;**35**:3100.
52. Galperin MY, Makarova KS, Wolf YI et al. Expanded microbial genome coverage and improved protein family annotation in the COG database. *Nucleic Acids Res* 2015;**43**:D261–9.
53. Mistry J, Chuguransky S, Williams L et al. Pfam: the protein families database in 2021. *Nucleic Acids Res* 2021;**49**:D412–9.
54. Wu Y-W, Simmons BA, Singer SW. Max bin 2.0: an automated binning algorithm to recover genomes from multiple metagenomic datasets. *Bioinformatics* 2016;**32**:605–7.
55. Jain C, Rodriguez-R LM, Phillippy AM et al. High throughput ANI analysis of 90K prokaryotic genomes reveals clear species boundaries. *Nat Commun* 2018;**9**:5114.
56. Altschul SF, Gish W, Miller W et al. Basic local alignment search tool. *J Mol Biol* 1990;**215**:403–10.
57. Sauer DB, Wang D-N. Predicting the optimal growth temperatures of prokaryotes using only genome derived features. *Bioinformatics* 2019;**35**:3224–31.
58. Rinke C, Schwientek P, Sczyrba A et al. Insights into the phylogeny and coding potential of microbial dark matter. *Nature* 2013;**499**:431–7.
59. Adam PS, Borrel G, Gribaldo S. Evolutionary history of carbon monoxide dehydrogenase/acetyl-CoA synthase, one of the oldest enzymatic complexes. *Proc Natl Acad Sci U S A* 2018;**115**:E1166–73.
60. Edgar RC. MUSCLE: a multiple sequence alignment method with reduced time and space complexity. *BMC Bioinformatics* 2004;**5**:113.
61. Minh BQ, Schmidt HA, Chernomor O et al. IQ-TREE 2: new models and efficient methods for phylogenetic inference in the genomic era. *Mol Biol Evol* 2020;**37**:1530–4.
62. Kalyaanamoorthy S, Minh BQ, Wong TKF et al. Model finder: fast model selection for accurate phylogenetic estimates. *Nat Methods* 2017;**14**:587–9.
63. Letunic I, Bork P. Interactive tree of life v2: online annotation and display of phylogenetic trees made easy. *Nucleic Acids Res* 2011;**39**:W475–8.
64. Jaekel U, Musat N, Adam B et al. Anaerobic degradation of propane and butane by sulfate-reducing bacteria enriched from marine hydrocarbon cold seeps. *ISME J* 2013;**7**:885–95.
65. Stagars MH, Emil Ruff S, Amann R et al. High diversity of anaerobic alkane-degrading microbial communities in marine seep sediments based on (1-methylalkyl)succinate synthase genes. *Front Microbiol* 2016;**6**:1511.
66. Khelifi N, Amin Ali O, Roche P et al. Anaerobic oxidation of long-chain n-alkanes by the hyperthermophilic sulfate-reducing archaeon *Archaeoglobus fulgidus*. *ISME J* 2014;**8**:2153–66.
67. Liu YF, Yang L, Liu ZL et al. Discovery of the non-cosmopolitan lineages in *Candidatus Thermopfundales*. *Environ Microbiol* 2022;**24**:3063–80.
68. Zeikus JG, Dawson MA, Thompson TE. Microbial ecology of volcanic sulphidogenesis: isolation and characterization of *Thermodesulfobacterium commune* gen. nov. and sp. nov. *J Gen Microbiol* 1983;**129**:1159–69.
69. Sonne-Hansen J, Ahring BK. *Thermodesulfobacterium hveragerdense* sp. nov., and *Thermodesulfobacterium islandicus* sp. nov., two thermophilic sulfate reducing bacteria isolated from a Icelandic hot spring. *Syst Appl Microbiol* 1999;**22**:559–64.
70. Jeanthon C, L'Haridon S, Cuffe V et al. *Thermodesulfobacterium hydrogeniphilum* sp. nov., a thermophilic, chemolithoautotrophic, sulfate-reducing bacterium isolated from a deep-sea hydrothermal vent at Guaymas Basin, and emendation of the genus *Thermodesulfobacterium*. *Int J Syst Evol Microbiol* 2002;**52**:765–72.
71. Moussard H, L'Haridon S, Tindall BJ et al. *Thermodesulfatator indicus* gen. nov., sp. nov., a novel thermophilic chemolithoautotrophic sulfate-reducing bacterium isolated from the central Indian ridge. *Int J Syst Evol Microbiol* 2004;**54**:227–33.
72. Chuvochina M, Rinke C, Parks DH et al. The importance of designating type material for uncultured taxa. *Syst Appl Microbiol* 2019;**42**:15–21.
73. Dong X, Greening C, Rattray JE et al. Metabolic potential of uncultured bacteria and archaea associated with petroleum seepage in deep-sea sediments. *Nat Commun* 2019;**10**:1816.
74. Birkeland N-K, Schönheit P, Poghosyan L et al. Complete genome sequence analysis of *Archaeoglobus fulgidus* strain 7324 (DSM 8774), a hyperthermophilic archaeal sulfate reducer from a North Sea oil field. *Stand Genomic Sci* 2017;**12**:79.
75. Stetter KO. *Archaeoglobus fulgidus* gen. nov., sp. nov.: a new taxon of extremely thermophilic archaebacteria. *Syst Appl Microbiol* 1988;**10**:172–3.
76. Klenk H-P, Clayton RA, Tomb J-F et al. The complete genome sequence of the hyperthermophilic, sulphate-reducing archaeon *Archaeoglobus fulgidus*. *Nature* 1997;**390**:364–70.
77. Burggraf S, Jannasch HW, Nicolaus B et al. *Archaeoglobus profundus* sp. nov., represents a new species within the sulfate-reducing archaebacteria. *Syst Appl Microbiol* 1990;**13**:24–8.
78. von Jan M, Lapidus A, Del Rio TG et al. Complete genome sequence of *Archaeoglobus profundus* type strain (AV18T). *Stand Genomic Sci* 2010;**2**:327–46.
79. Huber H, Jannasch H, Rachel R et al. *Archaeoglobus veneficus* sp. nov., a novel facultative chemolithoautotrophic hyperthermophilic sulfite reducer, isolated from abyssal black smokers. *Syst Appl Microbiol* 1997;**20**:374–80.
80. Mori K, Maruyama A, Urabe T et al. *Archaeoglobus infectus* sp. nov., a novel thermophilic, chemolithoheterotrophic archaeon isolated from a deep-sea rock collected at Suiyo seamount, Izu-Bonin arc, western Pacific Ocean. *Int J Syst Evol Microbiol* 2008;**58**:810–6.

81. Steinsbu BO, Thorseth IH, Nakagawa S *et al.* *Archaeoglobus sulfaticallidus* sp. nov., a thermophilic and facultatively lithoautotrophic sulfate-reducer isolated from black rust exposed to hot ridge flank crustal fluids. *Int J Syst Evol Microbiol* 2010;**60**: 2745–52.
82. Stokke R, Hocking WP, Steinsbu BO *et al.* Complete genome sequence of the thermophilic and facultatively chemolithoautotrophic sulfate reducer *Archaeoglobus sulfaticallidus* strain PM70-1T. *Genome Announc* 2013;**1**:e00406–13.
83. Stetter KO, Huber R, Blöchl E *et al.* Hyperthermophilic archaea are thriving in deep North Sea and Alaskan oil reservoirs. *Nature* 1993;**365**:743–5.
84. Anderson I, Risso C, Holmes D *et al.* Complete genome sequence of *Ferroglobus placidus* AEDII12DO. *Stand Genomic Sci* 2011;**5**:50.
85. Mardanov AV, Slododkina GB, Slobodkin AI *et al.* The *Geoglobus acetivorans* genome: Fe(III) reduction, acetate utilization, autotrophic growth, and degradation of aromatic compounds in a hyperthermophilic archaeon. *Appl Environ Microbiol* 2015;**81**:1003–12.
86. Manzella MP, Holmes DE, Rocheleau JM *et al.* The complete genome sequence and emendation of the hyperthermophilic, obligate iron-reducing archaeon “*Geoglobus ahangari*” strain 234T. *Stand Genomic Sci* 2015;**10**:77.
87. Spormann AM, Widdel F. Metabolism of alkylbenzenes, alkanes, and other hydrocarbons in anaerobic bacteria. *Biodegradation* 2000;**11**:85–105.
88. Stetter KO, Lauerer G, Thomm M *et al.* Isolation of extremely thermophilic sulfate reducers: evidence for a novel branch of archaeobacteria. *Science* 1987;**236**:822–4.
89. Hao L, McIlroy SJ, Kirkegaard RH *et al.* Novel prosthecate bacteria from the candidate phylum *Acetothermia*. *ISME J* 2018;**12**: 2225–37.
90. Hu P, Tom L, Singh A *et al.* Genome-resolved metagenomic analysis reveals roles for candidate phyla and other microbial community members in biogeochemical transformations in oil reservoirs. *MBio* 2016;**7**:e01669–15.
91. Takami H, Noguchi H, Takaki Y *et al.* A deeply branching thermophilic bacterium with an ancient acetyl-CoA pathway dominates a subsurface ecosystem. *PLoS One* 2012;**7**:e30559.
92. Meng J, Xu J, Qin D *et al.* Genetic and functional properties of uncultivated MCG archaea assessed by metagenome and gene expression analyses. *ISME J* 2014;**8**:650–9.
93. Vetriani C, Jannasch HW, Macgregor BJ *et al.* Population structure and phylogenetic characterization of marine benthic archaea in deep-sea sediments. *Appl Environ Microbiol* 1999;**65**:4375.
94. Lloyd KG, Schreiber L, Petersen DG *et al.* Predominant archaea in marine sediments degrade detrital proteins. *Nature* 2013;**496**: 215–8.
95. Kubo K, Lloyd KG, Biddle JF *et al.* Archaea of the miscellaneous Crenarchaeotal group are abundant, diverse and widespread in marine sediments. *ISME J* 2012;**6**:1949–65.
96. Zhu Q-Z, Wegener G, Hinrichs K-U *et al.* Activity of ancillary heterotrophic community members in anaerobic methane-oxidizing cultures. *Front Microbiol* 2022;**13**:912299.
97. Kellermann MY, Wegener G, Elvert M *et al.* Autotrophy as a predominant mode of carbon fixation in anaerobic methane-oxidizing microbial communities. *Proc Natl Acad Sci U S A* 2012;**109**:19321–6.
98. Adam PS, Borrel G, Brochier-Armanet C *et al.* The growing tree of archaea: new perspectives on their diversity, evolution and ecology. *ISME J* 2017;**11**:2407–25.
99. Mwirichia R, Alam I, Rashid M *et al.* Metabolic traits of an uncultured archaeal lineage -MSBL1- from brine pools of the Red Sea. *Sci Rep* 2016;**6**:19181.
100. Lazar CS, Baker BJ, Seitz KW *et al.* Genomic reconstruction of multiple lineages of uncultured benthic archaea suggests distinct biogeochemical roles and ecological niches. *ISME J* 2017;**11**:1118–29.
101. Adam PS, Borrel G, Gribaldo S. An archaeal origin of the wood-Ljungdahl H<sub>4</sub>MPT branch and the emergence of bacterial methylotrophy. *Nat Microbiol* 2019;**4**:2155–63.
102. Colman DR, Poudel S, Stamps BW *et al.* The deep, hot biosphere: twenty-five years of retrospection. *Proc Natl Acad Sci U S A* 2017;**114**:6895–903.
103. Brázda V, Luo Y, Bartas M *et al.* G-Quadruplexes in the archaea domain. *Biomol Ther* 2020;**10**:1349.
104. Schink B. Energetics of syntrophic cooperation in methanogenic degradation. *Microbiol Mol Biol Rev* 1997;**61**: 262–80.
105. Garcia PS, Gribaldo S, Borrel G. Diversity and evolution of methane-related pathways in archaea. *Annu Rev Microbiol* 2022;**76**:727–55.
106. Vanwonterghem I, Evans PN, Parks DH *et al.* Methylotrophic methanogenesis discovered in the archaeal phylum *Vestraeata* archaeota. *Nat Microbiol* 2016;**1**:16170.
107. Colman DR, Lindsay MR, Boyd ES. Mixing of meteoric and geothermal fluids supports hyperdiverse chemosynthetic hydrothermal communities. *Nat Commun* 2019;**10**: 681.
108. Hua Z-S, Wang Y-L, Evans PN *et al.* Insights into the ecological roles and evolution of methyl-coenzyme M reductase-containing hot spring archaea. *Nat Commun* 2019;**10**: 4574.
109. McKay LJ, Dlakić M, Fields MW *et al.* Co-occurring genomic capacity for anaerobic methane and dissimilatory sulfur metabolisms discovered in the Korarchaeota. *Nat Microbiol* 2019;**4**:614–22.
